# Supplementary material
Source: publisher figshare collection journal article supplement (https://karger.figshare.com/ndownloader/files/15017720)
Supplement: Supplementary file 1 [file 15017720]

Table S2:Overview of the main anatomical regions appearing within each ICA analysis, comparing humans and spider monkeys.

| **Brain region** | ***H. Sapiens**** | ***A. geoffroyi*** |
| --- | --- | --- |
|  | **Executive control** | **Executive control** |
|  | **Side of activation** | **Side of activation** |
| Corpus callosum (mid body) and septum |  | 2 bilateral components (left and right) |
| Cingulate gyrus | 2 bilateral components (left and right) | 2 bilateral components (left and right) |
| Paracentral lobe (medial face) | 2 bilateral components (left and right) | 2 bilateral components (left and right) |
| Inferior frontal gyrus | 2 bilateral components (left and right) | 2 bilateral components (left and right) |
| Front medial areas | 2 bilateral components (left and right) | 2 bilateral components (left and right) |
| Lateral surface of the hemispheres | 2 bilateral components (left and right) | 2 bilateral components (left and right) |
|
|  |  |  |
| **Brain region** | ***H. Sapiens**** | ***A. geoffroyi*** |
|  | **Working memory** | **Working memory** |  |
|  | **Side of activation** | **Side of activation** |
| Hypothalamus | 2 bilateral components (left and right) | 2 bilateral components (left and right) |
| Amygdala | 2 bilateral components (left and right) | 2 bilateral components (left and right) |
| Primary olfactory cortex |  | 2 bilateral components (left and right) |
| Entorhinal cortex |  | 2 bilateral components (left and right) |
| Prepyriform area |  | 2 bilateral components (left and right) |
| Olfactory bulbs |  | 2 bilateral components (left and right) |
| Medial olfactory area |  | 2 bilateral components (left and right) |
